# Supplementary material
Source: HighWire-hosted journal article supplement (https://bmjopen.bmj.com/content/6/9/e011071)
Supplement: inline-supplementary-material-1 [file inline-supplementary-material-1.pdf]

## **Supplement 1. MEDLINE OvidSP Search Strategy**

1. Dysmenorrhoea
2. Period pain
3. menstrual pain
4. cramps
- 5. Gyejibongneyong-hwan**
6. Guizhi-Fuling-Wan
7. Keishibukuryo-gan
8. randomized controlled trial.pt.
9. controlled clinical trial.pt.
10. randomized.ab.
11. placebo.tw.
12. clinical trials as topic.sh.
13. randomly.ab
14. trial.ti.
15. (crossover or cross-over or cross over).tw.
16. 8-15/or
17. exp animals/ not humans.sh.
18. 16 not 17
19. 21, and 18

## **Supplement 2. CNKI search strategy**

1. Dysmenorrhoea
2. Period pain
3. menstrual pain
4. cramps
- 5. Gyejibongneyong-hwan**
6. Guizhi-Fuling-Wan
7. Keishibukuryo-gan
8. random
9. control
10. clinical trial
11. blind procedure
12. placebo
- 13.16-20/or

### Supplement 3. Summary of randomized clinical studies form.

| First author (year) | Patients<br>No. (M/F);<br>Age, mean<br>Country (I/C);<br>Diagnosis;<br>Duration of<br>disease; | Intervention<br>Group<br>(Regime) | Control<br>group<br>(Regime) | Duration of<br>treatment<br>(total times) | Main<br>outcomes | Intergroup<br>differences | Adverse<br>events |
|---------------------|------------------------------------------------------------------------------------------------|-----------------------------------|------------------------------|-------------------------------------------|------------------|---------------------------|-------------------|
| Study 1             |                                                                                                |                                   |                              |                                           |                  |                           |                   |
| Study 2             |                                                                                                |                                   |                              |                                           |                  |                           |                   |
| Study 3             |                                                                                                |                                   |                              |                                           |                  |                           |                   |
| .....               |                                                                                                |                                   |                              |                                           |                  |                           |                   |

Supplement 4. Summarized interventions in the included studies.

| First author (year) | Herbal type Method (Fixed/Partially Individualized/ Individualized) <sup>1</sup> | Treatment rationale | Regimen | Response Sought | Co-intervention |
|---------------------|----------------------------------------------------------------------------------|---------------------|---------|-----------------|-----------------|
| Study 1             |                                                                                  |                     |         |                 |                 |
| Study 2             |                                                                                  |                     |         |                 |                 |
| Study 3             |                                                                                  |                     |         |                 |                 |
| .....               |                                                                                  |                     |         |                 |                 |

1. Herbal type was classified into 3 categories on the basis of the types “pill”, “decoction” and means.

**Supplement 5. Risks of bias in the included RCTs.**

| First author (year) | Random sequence generation | Allocation concealment | Blinding of participants and personnel | Blinding of outcome assessment | Incomplete outcome data | Selective reporting | Other sources of bias |
|---------------------|----------------------------|------------------------|----------------------------------------|--------------------------------|-------------------------|---------------------|-----------------------|
| Study 1             |                            |                        |                                        |                                |                         |                     |                       |
| Study 2             |                            |                        |                                        |                                |                         |                     |                       |
| Study 3             |                            |                        |                                        |                                |                         |                     |                       |
| .....               |                            |                        |                                        |                                |                         |                     |                       |

‘L’ indicates a low risk of bias; ‘U’ indicates that the risk of bias is uncertain; ‘H’ indicates a high risk of bias.
